# Supplementary material
Source: publisher figshare collection journal article supplement (https://diabetesjournals.figshare.com/ndownloader/files/36376074)
Supplement: Supplementary file 1 [file 36376074]

**Supplemental information**

**Smooth Muscle Insulin Receptor Deletion Causes Voiding Dysfunction: A Mechanism for  
Diabetic Bladder Dysfunction**

Huan Chen<sup>1</sup>, Ali Wu<sup>1</sup>, Mark L. Zeidel<sup>1</sup>, Weiqun Yu<sup>1\*</sup>

<sup>1</sup>Department of Medicine, Beth Israel Deaconess Medical Center and Harvard Medical School,  
Boston, Massachusetts

Supplemental figure 1. Male *SMIR*<sup>-/-</sup> mice exhibit impaired glucose and insulin tolerance. (A) Blood glucose levels of male mice fasted (n=9, 9, and 6 for *WT*, *SMIR*<sup>+/-</sup> and *SMIR*<sup>-/-</sup> mice) for 14 hours, or non-fasted (n=11, 17, and 10 for *WT*, *SMIR*<sup>+/-</sup> and *SMIR*<sup>-/-</sup> mice). (B) GTT in male *WT* (n=9), *SMIR*<sup>+/-</sup> (n=9) and *SMIR*<sup>-/-</sup> (n=6) mice and (C) is area under the curve for (B). (D) ITT in male *WT* (n=10), *SMIR*<sup>+/-</sup> (n=8) and *SMIR*<sup>-/-</sup> (n=5) mice and (E) is area under the curve for (D). Data are shown as boxes and whiskers, the centerline is the median of the data set, the box represents 75% of the data, and bars indicate whiskers from minimum to maximum. Data were analyzed using the student *t* test. \*: *p* < 0.05 and \*\*: *p* < 0.01 compared to *WT* mice, #: *p* < 0.05 and ##: *p* < 0.01 compared between *SMIR*<sup>+/-</sup> and *SMIR*<sup>-/-</sup> mice.

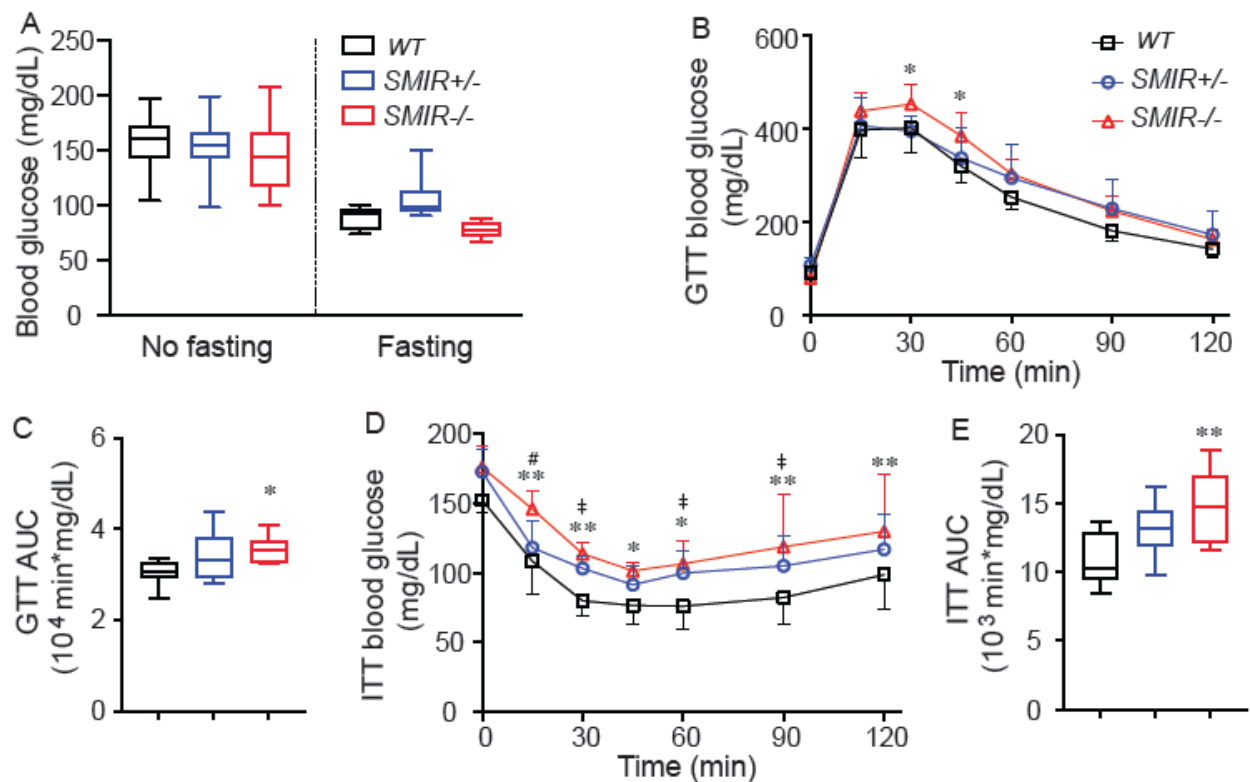

Supplemental figure 2. Adiponectin expression in bladder wall. Immunostaining and imaging of adiponectin (green) in the vasculature (white arrow) and BSM cells (white arrow head) of bladder wall. Nuclei are stained with Dapi (blue). White bar represents 20  $\mu$ m length.

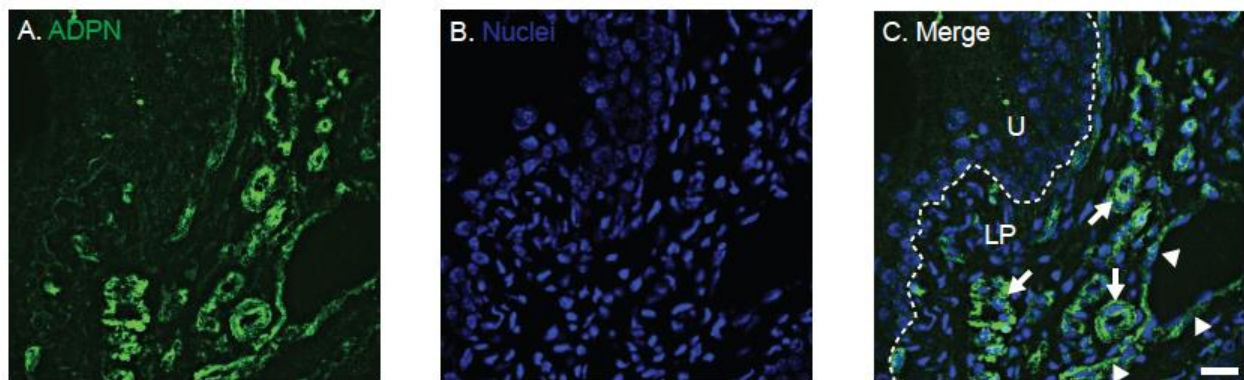

Supplemental table 1.

Information of antibodies used in the study

| Antibody | Host   | Company                    | Catalog No. |
|----------|--------|----------------------------|-------------|
| Chrm3    | Rabbit | Thermo Fisher Scientific   | PA5-77485   |
| P2x1     | Rabbit | Alomone lab                | APR-001     |
| Itgβ1    | Rabbit | Thermo Fisher Scientific   | 9699        |
| Sm22     | Rabbit | ABCAM                      | Ab14106     |
| Cav1.2   | Rabbit | EMD Millipore              | AB5256      |
| Insrβ    | Rabbit | Cell Signaling Technology  | 23413       |
| Akt      | Rabbit | Cell Signaling Technology  | 9272        |
| p-Akt    | Rabbit | Cell Signaling Technology  | 4060        |
| FoxO1    | Rabbit | Cell Signaling Technology  | 2880        |
| FoxO3a   | Rabbit | Cell Signaling Technology  | 12829       |
| FoxO6    | Rabbit | Brunet lab, Stanford Univ. | NA          |
| mTOR     | Rabbit | Cell Signaling Technology  | 2983        |
| p-mTOR   | Rabbit | Cell Signaling Technology  | 5536        |
| Adpn     | Goat   | R&D system                 | AF1119      |
| Ampk     | Rabbit | Cell Signaling Technology  | 2532        |
| p-Ampk   | Rabbit | Cell Signaling Technology  | 2535        |
| β actin  | Rabbit | Cell Signaling Technology  | 4967        |
